# Supplementary material for: Accuracy and precision of responses to visual analog scales: Inter- and intra-individual variability
Source: PubMed Central journal article supplement (PMC10700476; doi:10.3758/s13428-022-02021-0), 2022-11-17
Supplement: 13428_2022_2021_MOESM1_ESM.pdf [file 13428_2022_2021_MOESM1_ESM.pdf]

**Accuracy and precision of responses to visual analog scales:  
Inter- and intra-individual variability**

**Supplementary figures**

*Behavior Research Methods*

<https://doi.org/10.3758/s13428-022-02021-0>

Miguel A. García-Pérez and Rocío Alcalá-Quintana  
Departamento de Metodología, Facultad de Psicología, Universidad Complutense,  
Campus de Somosaguas, 28223 Madrid, Spain

|         |    | Removed settings in unmarked VAS |      |      |      | Removed settings in marked VAS |      |     |      | Target value |      |
|---------|----|----------------------------------|------|------|------|--------------------------------|------|-----|------|--------------|------|
|         |    | 7                                | 16   | 28   | 37   | 43                             | 55   | 69  | 72   | 84           | 93   |
| Subject | 4  |                                  |      |      | 0.0  |                                |      |     |      |              |      |
|         | 5  |                                  |      | 0.0  |      |                                |      |     |      |              |      |
|         | 6  |                                  |      |      | 7.7  |                                |      |     | 92.7 |              | 0.0  |
|         | 8  |                                  | 11.4 | 37.8 |      |                                |      |     | 77.6 |              |      |
|         | 10 |                                  |      |      |      | 50.7                           |      |     |      |              |      |
|         | 12 | 8.1                              | 0.0  |      |      |                                | 51.6 |     |      | 88.6         |      |
|         | 13 |                                  |      |      |      |                                |      |     |      | 89.2         |      |
|         | 14 |                                  | 11.4 | 11.1 | 23.2 |                                |      |     |      |              |      |
|         | 17 |                                  |      | 37.3 |      | 45.3                           |      |     |      |              |      |
|         | 19 |                                  | 10.4 |      |      |                                |      |     | 72.8 |              |      |
|         | 20 | 11.3                             | 11.1 |      |      |                                |      |     |      | 89.4         |      |
|         | 21 |                                  |      |      |      | 40.1                           |      |     |      |              |      |
|         | 22 |                                  |      | 27.6 |      | 0.0                            |      |     |      |              | 76.9 |
|         | 23 |                                  |      |      |      |                                |      |     | 64.6 | 91.4         |      |
|         | 28 |                                  | 10.8 |      |      |                                |      |     |      | 56.6         | 89.7 |
|         | 31 |                                  |      |      | 26.8 |                                |      |     |      |              |      |
| 32      |    |                                  |      |      |      |                                |      | 0.0 |      |              |      |
| 35      |    |                                  |      |      |      |                                |      |     | 87.5 |              |      |

**Supplementary Figure S1.** Settings (numerals in cells) removed for some subjects (rows) at some target values (columns) in the condition without intermediate tick marks (red) and with them (blue).

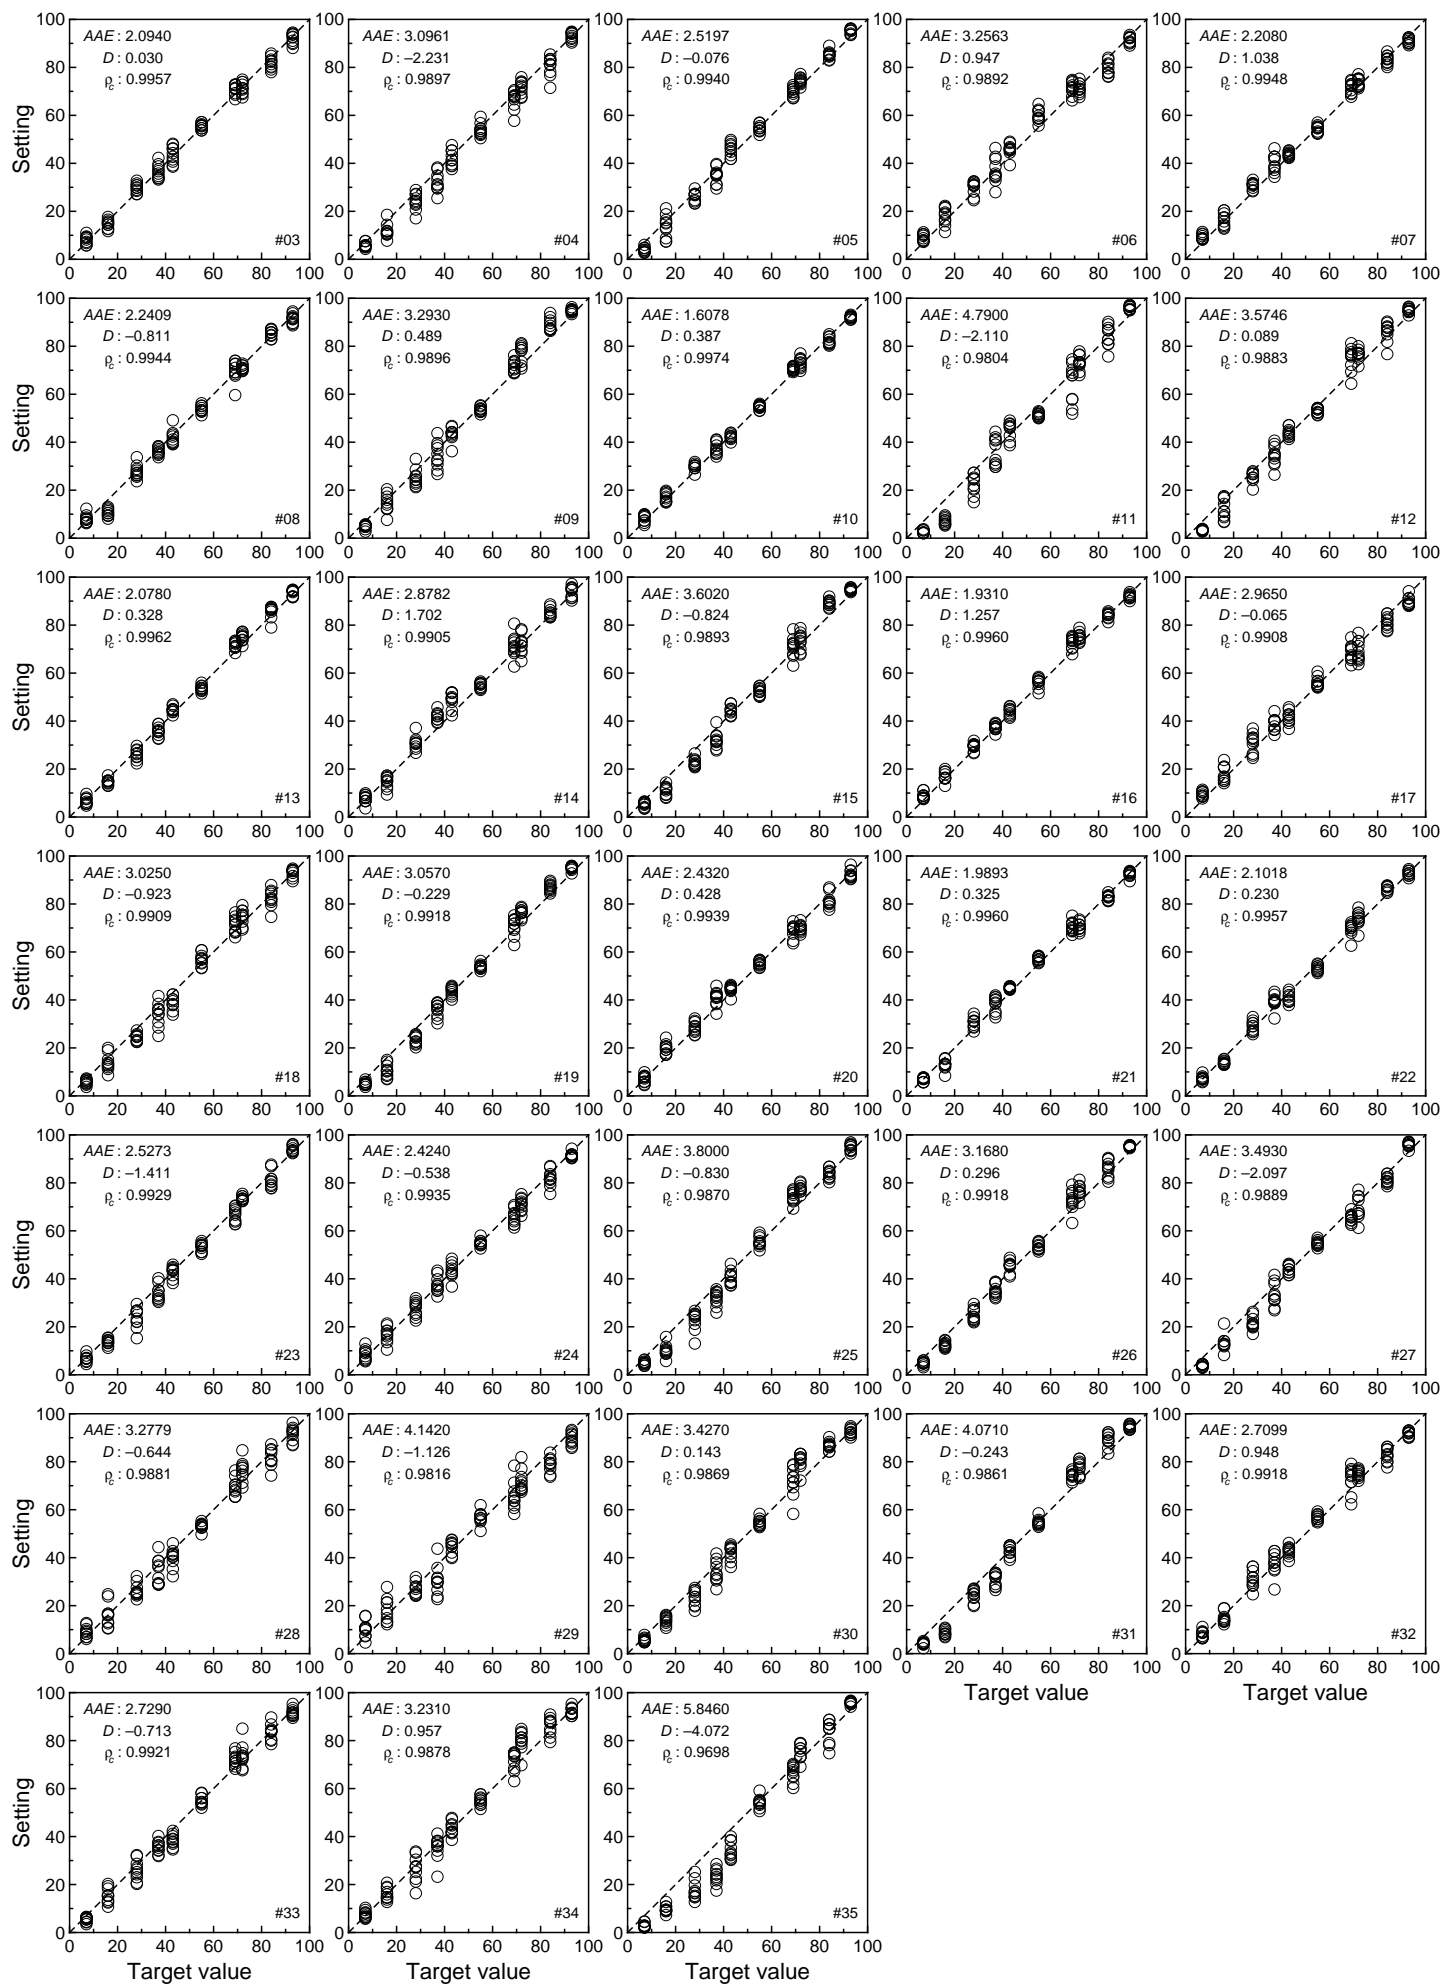

**Supplementary Figure S2.** Scatter plot of settings against target values for all subjects in the condition without intermediate tick marks. Graphical conventions as in Fig. 1a in the paper.

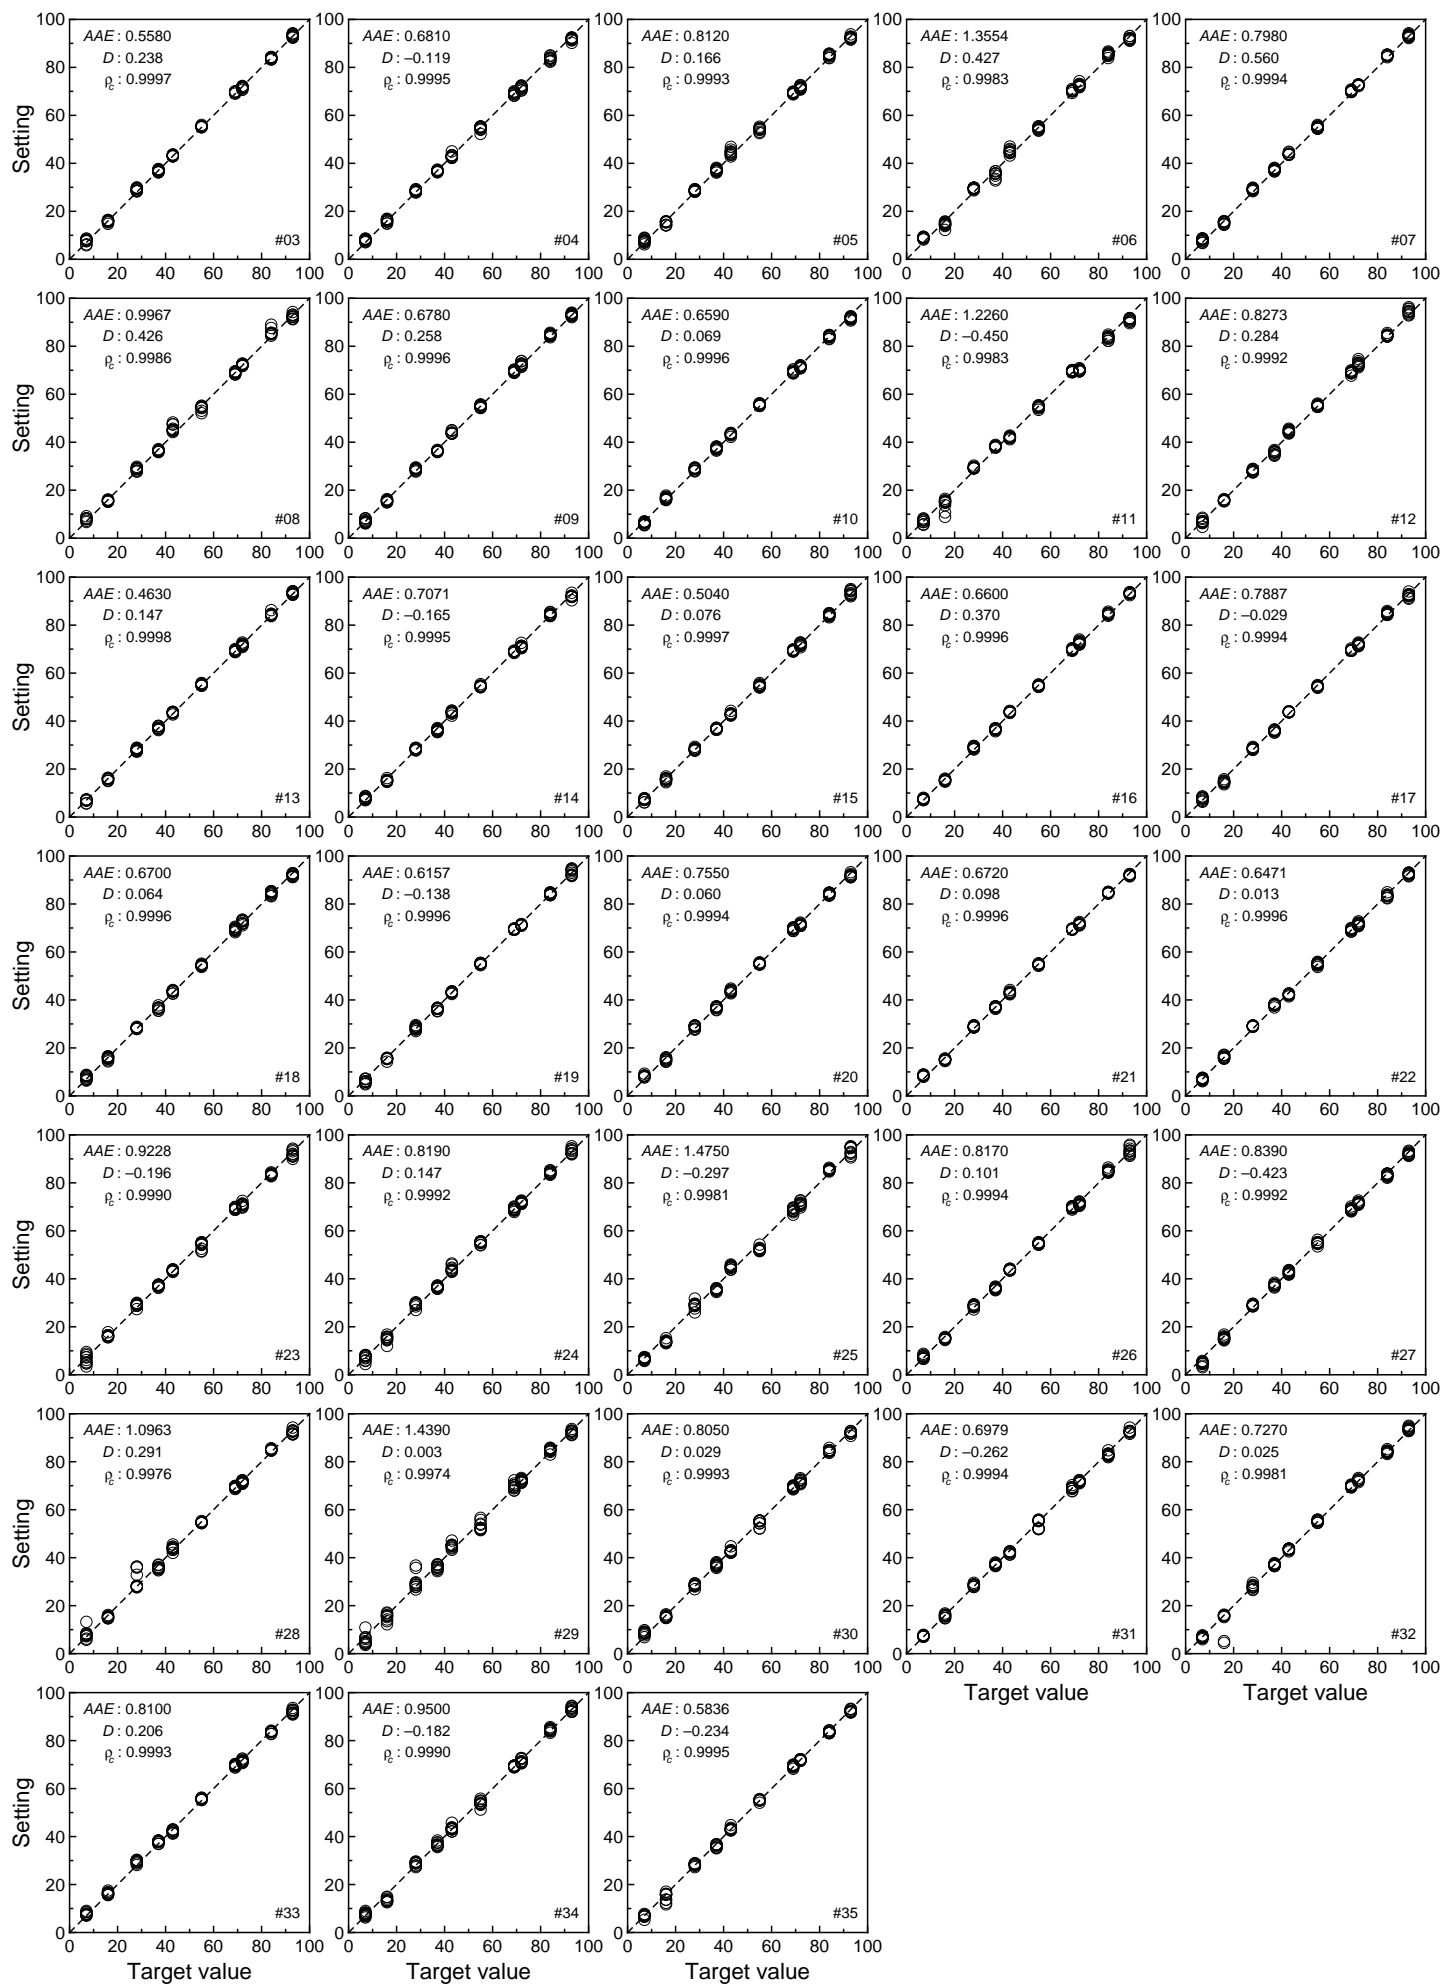

**Supplementary Figure S3.** Scatter plot of settings against target values for all subjects in the condition with intermediate tick marks. Graphical conventions as in Fig. 1b in the paper.
